# Supplementary material
Source: Research Square preprint supplement (doi:10.21203/rs.3.rs-8340172/v1)
Supplement: Supplementary file 1 [file b663ae9d1f19e9a89d51ad49.docx]

**Supplementary Material**

Patient pre-and post-survey for donors and recipients receiving education with personalized 3D Printed Organ Models

| **Pre-Survey** | **Survey Responses** | | | | |
| --- | --- | --- | --- | --- | --- |
| 1) What type of procedure are you having? | Kidney Transplant | | Liver Transplant | | |
| 2) Are you donating or receiving an organ? | I am donating | | I am receiving | | |
| 3) Do you have a professional job that involves knowledge of biology, anatomy, and/or function of the liver/kidney? | Yes  (0-1 years) | Yes  (1-5 years) | Yes  (5-15 years) | Yes  (15+ years) | No |
| 4) Have you read any information about your upcoming surgery? | Yes | | No | | |
| 5) Have you watched any videos about your upcoming surgery? | Yes | | No | | |
| 6) Please rate your current anxiety level in regard to the surgery from 0-10. | Sliding Scale Response (0 = least anxious to 10 = most anxious) | | | | |
| 7) Please rate each statement from strongly agree to strongly disagree: | Strongly disagree | Somewhat disagree | Neither agree nor disagree | Somewhat agree | Strongly agree |
| 7.1) I am worried about the procedure. |
| 7.2) The procedure is on my mind continually. |
| 7.3) I would like to know as much as possible about the procedure. |
| 7.4) I have a good understanding of the anatomy and function of the liver/kidney. |
| 7.5) I have a good understanding of the transplant procedure. |
| 7.6) I could explain the main steps of the surgical procedure to someone else. |
| 7.7) I know what part of my liver/kidney is involved in the transplant procedure. |
| 7.8) I think a 3D model would improve my knowledge of the transplant procedure. |
| **Post-Survey** | **Survey Responses** | | | | |
| 8) Please rate each statement from strongly agree to strongly disagree: | Strongly disagree | Somewhat disagree | Neither agree nor disagree | Somewhat agree | Strongly agree |
| 8.1) Due to the 3D model, I have a better understanding of the surgical procedure and risks. |
| 8.2) As a result of the 3D model, I feel more secure about the planned surgery. |
| 8.3) As a result of the 3D model I have a better understanding of my specific anatomy and organs. |
| 8.4) The model was useful for understanding potential complications of the procedure. |
| 8.5) I want my doctor to use 3D models in my future care. |
| 8.6) I would recommend similar use of 3D models to other patients. |
| 8.7) I think the 3D model improved my knowledge of the transplant procedure. |
| 9) Please rate your current anxiety level in regard to the surgery from 0-10. | Sliding Scale Response (0 = least anxious to 10 = most anxious) | | | | |
| 10) Please rate each statement from strongly agree to strongly disagree: | Strongly disagree | Somewhat disagree | Neither agree nor disagree | Somewhat agree | Strongly agree |
| 10.1) I am worried about the procedure. |
| 10.2) The procedure is on my mind continually. |
| 10.3) I would like to know as much as possible about the procedure. |
| 10.4) I have a good understanding of the anatomy and function of the liver/kidney. |
| 10.5) I have a good understanding of the transplant procedure. |
| 10.6) I could explain the main steps of the surgical procedure to someone else. |
| 10.7) I know what part of my liver/kidney is involved in the transplant procedure. |
| 10.8) I think a 3D model would improve my knowledge of the transplant procedure. |
| 11) Please rate each statement from strongly agree to strongly disagree: | Strongly disagree | Somewhat disagree | Neither agree nor disagree | Somewhat agree | Strongly agree |
| 11.1) I have a good understanding of the anatomy and function of the liver/kidney. |
| 11.2) I have a good understanding of the transplant procedure. |
| 11.3) I could explain the main steps of the surgical procedure to someone else. |
| 11.4) I know what part of my liver/kidney is involved in the transplant procedure. |
| 11.5) I think a 3D model would improve my knowledge of the transplant procedure. |
